# Supplementary material for: The BTB-Containing Protein Kctd15 Is SUMOylated In Vivo
Source: PubMed Central journal article supplement (PMC3782465; doi:10.1371/journal.pone.0075016), 2013-09-24
Supplement: pone.0075016.s001.pdf [file pone.0075016.s001.pdf]

**Table S1. SUMOplot analysis for Kctd family members.**

|               | No.           | Pos. | Group                   | Score                   |               | No.            | Pos. | Group                    | Score                   |             |
|---------------|---------------|------|-------------------------|-------------------------|---------------|----------------|------|--------------------------|-------------------------|-------------|
| <b>KCTD1</b>  | 1             | K860 | PSVIR <b>IKQE</b> PLD   | <b>0.94</b>             | <b>KCTD17</b> | 1              | K54  | TLCRE <b>QKSF</b> LSRLC  | 0.15                    |             |
|               | 2             | K527 | QVGPD <b>VKSE</b> AAPKR | <b>0.93</b>             |               | <b>KCTD18</b>  | 1    | K49                      | SGRFP <b>LKTD</b> ESGAC | <b>0.91</b> |
|               | 3             | K572 | VVVVS <b>VKHD</b> PLPLL | <b>0.93</b>             |               |                | 2    | K188                     | HSKGI <b>FKRE</b> AGNNV | <b>0.85</b> |
|               | 4             | K736 | LEMER <b>WKQD</b> RETGR | 0.64                    |               |                | 3    | K5                       | MEG <b>HKAE</b> BEVLD   | 0.52        |
|               | 5             | K721 | LLYEE <b>AKYF</b> QLQPM | 0.44                    |               |                | 4    | K369                     | KVLLS <b>DKKP</b> TPQRV | 0.39        |
|               | 6             | K269 | LAAVI <b>RKLE</b> EQGAG | 0.44                    |               | <b>KCTD19</b>  | 1    | K875                     | LAITG <b>FKDD</b> RHTQE | <b>0.85</b> |
| <b>KCTD2</b>  | 1             | K209 | TMSDG <b>WKFE</b> QLISI | 0.64                    | 2             |                | K145 | PSEFP <b>IKSP</b> AFTGL  | <b>0.84</b>             |             |
|               | 2             | K113 | PELDS <b>DKDE</b> TGAYL | 0.50                    | 3             |                | K296 | ALGLL <b>VKYP</b> DSALG  | <b>0.82</b>             |             |
| <b>KCTD3</b>  | 1             | K299 | ATSHT <b>GKVG</b> VWNAV | 0.50                    | 4             |                | K416 | TLQTL <b>LKYP</b> ELLSN  | <b>0.80</b>             |             |
|               | 2             | K805 | PSPRH <b>KKSD</b> SSGQE | 0.48                    | 5             |                | K106 | QTLDN <b>LKEG</b> KHHLR  | <b>0.73</b>             |             |
|               | 3             | K344 | YYIDM <b>QKFP</b> LRMKD | 0.39                    | 6             |                | K184 | PLDLV <b>AKYP</b> SLVTE  | <b>0.69</b>             |             |
|               | 4             | K769 | GFLGR <b>KKVP</b> YLASS | 0.37                    | 7             |                | K355 | LCAFL <b>DKRD</b> ITYEP  | 0.50                    |             |
| <b>KCTD4</b>  | 1             | K201 | QFKYF <b>IKSE</b> NGTRL | <b>0.94</b>             | 8             |                | K621 | TINLT <b>QKSE</b> TKDPP  | 0.50                    |             |
|               | 2             | K211 | GTRLV <b>LKED</b> NTFVC | <b>0.91</b>             | 9             |                | K155 | FTGLH <b>DKAP</b> LGLMD  | 0.39                    |             |
|               | 3             | K224 | CTLET <b>LKFE</b> AIMMA | <b>0.91</b>             | 10            |                | K695 | HSTAS <b>EKDP</b> GPQAG  | 0.39                    |             |
|               | 4             | K233 | AIMMA <b>LKCG</b> FRLLT | <b>0.73</b>             | 11            |                | K710 | GAGAK <b>DKGP</b> EPTFK  | 0.39                    |             |
|               | 5             | K197 | SNIQ <b>FKYF</b> IKSEN  | 0.50                    | 12            |                | K838 | MDSIR <b>QKDP</b> KAITA  | 0.39                    |             |
| <b>KCTD5</b>  | 1             | K180 | TMSDG <b>WKFE</b> QLVSI | 0.64                    | 13            |                | K456 | NFLRL <b>GKLF</b> LPSEF  | 0.32                    |             |
|               | 2             | K84  | PDLDS <b>DKDE</b> TGAYL | 0.50                    | 14            |                | K897 | TLPFA <b>RKYG</b> RCMDL  | 0.27                    |             |
|               | 3             | K67  | TLCRD <b>PKSF</b> LYRLC | 0.26                    | 15            |                | K862 | TLHIS <b>PKQF</b> VVDLL  | 0.26                    |             |
| <b>KCTD6</b>  | 1             | K84  | TLPLD <b>FKEF</b> DLLRK | 0.50                    | <b>KCTD20</b> | 1              | K252 | IMVGC <b>AKKG</b> ERECH  | 0.62                    |             |
|               | 2             | K234 | FCRLA <b>RKTD</b> D     | 0.44                    |               | 2              | K161 | FTRPN <b>EKGE</b> YEIAE  | 0.50                    |             |
| <b>KCTD7</b>  | 1             | K148 | ENMQP <b>LKGE</b> KVRQA | <b>0.91</b>             |               | 3              | K357 | IQMSW <b>EKEE</b> GKSRRH | 0.50                    |             |
|               | 2             | K194 | LKVCV <b>FKEE</b> MPITP | <b>0.85</b>             |               | 4              | K253 | MVGCA <b>KKGE</b> RECHI  | 0.48                    |             |
| <b>KCTD8</b>  | 1             | K330 | QKIVS <b>PKQE</b> HEDRK | 0.61                    |               | 5              | K233 | SNDGA <b>HKQF</b> DHYLE  | 0.17                    |             |
|               | 2             | K337 | QEHEd <b>RKHD</b> KVTDK | 0.44                    | <b>KCTD21</b> | 1              | K36  | GAMFS <b>GKMP</b> TKRDS  | 0.57                    |             |
|               | 3             | K395 | LDRPS <b>KKAP</b> VQWIP | 0.37                    |               | 2              | K54  | FIDRD <b>GKVF</b> RYILN  | 0.32                    |             |
|               | 4             | K470 | QSELL <b>QKYG</b> L     | 0.33                    | <b>SHKBP1</b> | 1              | K44  | GRIST <b>LKDE</b> TGAIF  | <b>0.91</b>             |             |
| <b>KCTD9</b>  | 1             | K46  | TSVYN <b>GKGG</b> LIDDI | 0.50                    |               | 2              | K576 | AMEIA <b>GKVD</b> IKALG  | <b>0.67</b>             |             |
|               | 2             | K13  | FLNGS <b>PKNG</b> KVVAV | 0.43                    |               | 3              | K297 | ATSHT <b>GKVG</b> VWNAV  | 0.50                    |             |
|               | 3             | K203 | HSPIS <b>RKEF</b> VRFLI | 0.09                    |               | 4              | K342 | YYIDV <b>QKFP</b> LRMKD  | 0.39                    |             |
| <b>KCTD10</b> | 1             | K303 | VRRIH <b>IKRP</b> DDRAH | <b>0.84</b>             |               | 5              | K15  | HLNVG <b>GKRF</b> STSRQ  | 0.32                    |             |
|               | 2             | K82  | LIDRC <b>GKHF</b> GTILN | 0.32                    | <b>Btbd10</b> | 1              | K41  | TSSRI <b>AKGG</b> VDHTK  | 0.62                    |             |
| <b>KCTD11</b> | 1             | K31  | FIDRD <b>GKAF</b> RHILN | 0.32                    |               | 2              | K157 | FVYEN <b>AKEG</b> ARNIR  | 0.62                    |             |
|               | <b>KCTD12</b> | 1    | K148                    | SRRGV <b>HKEG</b> SLGDE |               | 0.34           | 3    | K211                     | FTRPN <b>EKGE</b> YEVAE | 0.50        |
| 2             |               | K193 | CFLQD <b>KKMF</b> KSVVK | 0.13                    |               | 4              | K407 | IRMSW <b>EKEE</b> GKSRRH | 0.50                    |             |
| 3             |               | K136 | GEQVS <b>RKQF</b> LLQVP | 0.09                    |               | 5              | K383 | YKEKV <b>KKRP</b> GGRPE  | 0.37                    |             |
| <b>KCTD13</b> |               | 1    | K140                    | QLALQ <b>QKRE</b> TLSPL | 0.50          | <b>TNFAIP1</b> | 1    | K144                     | PIITS <b>LKEE</b> ERLIE | <b>0.91</b> |
|               | <b>KCTD14</b> | 1    | K200                    | MFKSV <b>VKFG</b> PWKAV | <b>0.76</b>   |                | 2    | K21                      | PKLSG <b>FKGG</b> GLGNK | <b>0.68</b> |
|               |               | 2    | K53                     | TLGTL <b>RKFP</b> GSKLA | 0.34          |                | 3    | K127                     | QSALQ <b>DKKD</b> SYQPV | 0.50        |
|               |               | 3    | K193                    | CFLQD <b>KKMF</b> KSVVK | 0.13          |                | 4    | K67                      | MEVLT <b>DKEG</b> WILID | 0.33        |
|               |               | 4    | K136                    | GEQVS <b>RKQF</b> LLQVP | 0.09          |                | 5    | K78                      | LIDRC <b>GKHF</b> GTILN | 0.32        |
| <b>KCTD15</b> | 1             | K278 | PTAVR <b>IKQE</b> PLD   | <b>0.94</b>             | <b>KCNRG</b>  | 1              | K24  | TRFST <b>IKQF</b> PASRL  | 0.59                    |             |
|               | 2             | K129 | LLPDD <b>FKDF</b> SLLYE | 0.50                    |               | 2              | K14  | TLNVG <b>GKIF</b> TTRFS  | 0.32                    |             |
| <b>KCTD16</b> | 1             | K107 | PEKGR <b>LKRE</b> AEYFQ | <b>0.91</b>             |               |                |      |                          |                         |             |
|               | 2             | K406 | QDFLK <b>IKIP</b> DRFPE | <b>0.84</b>             |               |                |      |                          |                         |             |
|               | 3             | K347 | TLDRP <b>IKKG</b> PVQLI | <b>0.77</b>             |               |                |      |                          |                         |             |
|               | 4             | K296 | CCCKN <b>GKGD</b> KEGES | <b>0.67</b>             |               |                |      |                          |                         |             |
|               | 5             | K58  | WKMFS <b>PKRD</b> TANDL | 0.61                    |               |                |      |                          |                         |             |
|               | 6             | K362 | QSEMR <b>RKSD</b> LLRTL | 0.44                    |               |                |      |                          |                         |             |
